# Supplementary material for: Truncated TDP‐43 proteoforms diagnostic of frontotemporal dementia with TDP‐43 pathology
Source: PubMed Central journal article supplement — Alzheimers Dement. 2023 Jul 17;20(1):103–11. doi: 10.1002/alz.13368 (PMC10917011; doi:10.1002/alz.13368), 2023-07-17
Supplement: ALZ-20-103-s001.pdf [file ALZ-20-103-s001.pdf]

# Supplemental Material

## Truncated TDP-43 proteoforms diagnostic of frontotemporal dementia with TDP-43 pathology

Lauren M. Forgrave<sup>a</sup>, Kyung-Mee Moon<sup>b</sup>, Jordan E. Hamden<sup>a</sup>, Yun Li<sup>a</sup>, Phoebe Lu<sup>a</sup>, Leonard J Foster<sup>b</sup>, Ian R. A. Mackenzie<sup>a,c</sup>, Mari L. DeMarco<sup>a,d\*</sup>

<sup>a</sup> Department of Pathology and Laboratory Medicine, University of British Columbia, Canada

<sup>b</sup> Department of Biochemistry and Molecular Biology and Michael Smith Laboratories, University of British Columbia, Canada, <sup>c</sup> Department of Pathology and Laboratory Medicine, Vancouver General Hospital, Canada, <sup>d</sup> Department of Pathology and Laboratory Medicine, St. Paul's Hospital, Providence Health Care, 1081 Burrard St, Vancouver, Canada, V6Z 1Y6. \* Corresponding author: Mari L. DeMarco, E-mail: [mari.demarco@ubc.ca](mailto:mari.demarco@ubc.ca)

### Table of Contents

|       |                                                                                                                                                        |    |
|-------|--------------------------------------------------------------------------------------------------------------------------------------------------------|----|
| 1     | Supplemental methods .....                                                                                                                             | 2  |
| 1.1   | Materials .....                                                                                                                                        | 2  |
| 1.2   | Sample preparation .....                                                                                                                               | 2  |
| 1.3   | High resolution mass spectrometry.....                                                                                                                 | 3  |
| 1.4   | Targeted mass spectrometry .....                                                                                                                       | 4  |
| 1.4.1 | Method development .....                                                                                                                               | 4  |
| 1.4.2 | Peptide quantification .....                                                                                                                           | 4  |
| 1.4.3 | Method validation .....                                                                                                                                | 4  |
| 2     | Supplemental figures .....                                                                                                                             | 5  |
|       | <b>Supplemental Figure 1:</b> Representative chromatograms and linearity.....                                                                          | 5  |
|       | <b>Supplemental Figure 2:</b> TDP-43 proteoform concentration.....                                                                                     | 5  |
|       | <b>Supplemental Figure 3:</b> The concentration of truncated proteoforms did not correlate with the concentration of intact TDP-43.....                | 6  |
|       | <b>Supplemental Figure 4:</b> The ratio of C-to-N-terminal TDP-43 peptides did not discriminate cases with and without TDP-43 pathology .....          | 6  |
|       | <b>Supplemental Figure 5:</b> Investigations of the correlation/effects of low-TDP-43 concentration with (A) age, (B) sex, and (C) genetic status..... | 6  |
| 3     | Supplemental tables .....                                                                                                                              | 7  |
|       | <b>Supplemental Table 1:</b> Characterization of cases.....                                                                                            | 7  |
|       | <b>Supplemental Table 2:</b> Transitions monitored .....                                                                                               | 9  |
|       | <b>Supplemental Table 3:</b> Upper and lower limit of the measuring interval .....                                                                     | 9  |
|       | <b>Supplemental Table 4:</b> TDP-43 peptides identified in published discovery proteomics studies                                                      |    |
|       | 10                                                                                                                                                     |    |
| 4     | References.....                                                                                                                                        | 11 |

## 1 Supplemental methods

### 1.1 Materials

The following materials were obtained from the indicated commercial sources: ammonium persulfate [A3678], bicinchoninic acid protein assay kit [BCA1-1KT], Calcium chloride [10043-52-4], dithiothreitol (DTT) [D9779], ethanol [362808], ethylenediaminetetraacetic acid (EDTA) [E4884], formic acid [399388], iodoacetamide [I5161], N-lauroylsarcosine (sarkosyl) [61745], N,N,N0,N0-tetramethylethylenediamine [T9281], sodium chloride (NaCl) [S7653], sodium dodecyl sulfate (SDS) [L3771], Tween 20 [P1379] and urea [U5378] were obtained from Sigma-Aldrich (Canada). Acetonitrile (ACN) [BDH83640], acrylamide/bis-acrylamide solution [J63279], ammonium hydrogen carbonate (AHC) [A18566], bovine serum albumin (BSA) [0332], Coomassie G250 [0615], Eppendorf 1.5 mL Protein LoBind tubes [022431081], and Laemmli SDS sample buffer [J61337], Roche protease inhibitors [4693159001], tris [0826], and tris buffered saline (TBS) [97063-680] were obtained from VWR (Canada). Tosyl phenylalanyl chloromethyl ketone-treated (TPCK) trypsin [LS003744] was obtained from Worthington (USA). Clarity Max ECL substrate [1705062], filter paper [09-802-1A], and nitrocellulose membrane [1620115] were obtained from Bio-Rad. Chymotrypsin, TLCK-treated, mass spectrometry grade [90056], C18 extraction disks [2215] C18 silica [711025-100], methanol [A456-4], and molecular weight protein ladder [26616] were obtained from Fisher Scientific (Canada). Anti-phosphorylated-TDP-43 rat monoclonal antibody clone 1D3 [829901] was obtained from Biogen (USA). Horseradish peroxidase (HRP)-conjugated rabbit anti-rat IgG antibody [ab-6734] was obtained from Abcam (Canada). Oasis MCX uElution plates [186001830BA] were purchased from Waters (Canada). Heavy labelled peptides TDP<sub>252-263</sub> [arginine <sup>13</sup>C and <sup>15</sup>N-labeled, synthesized by New England Peptide] and TDP<sub>276-293</sub> lysine <sup>13</sup>C and <sup>15</sup>N-labeled, synthesized by Vivitide].

Equipment used in this analysis included centrifugal vacuum (Vacufuge plus, Eppendorf), gel imager (G:BOX Chemi XRQ, Syngene, USA), microvolume spectrophotometry (ND-8000, NanoDrop Technologies, USA), and ultrasonication probe (FB120110, Fisher Scientific). For discovery proteomics experiments, a nanoflow LC-quadrupole high resolution time of flight mass spectrometer (Easy nano LC 1000 LC, ThermoFisher Scientific; Bruker Impact II QTOF, Canada) was used. For biomarker verification experiments, a  $\mu$ LC-triple quadrupole mass spectrometer (SCIEX M5  $\mu$ LC and QTRAP 6500, Canada), with an in-line 5  $\mu$ m C18, 20  $\times$  0.3 mm trap column (Luna, Phenomenex, USA), and 2.6  $\mu$ m XB-C18, 50  $\times$  0.3 mm microflow analytical column (Kintex, Phenomenex) were used.

### 1.2 Sample preparation

Brain tissue was homogenized using a pestle for 2 min in tris-EDTA (TE) buffer (10 mM tris-HCL and 1 mM EDTA, pH 7.5, and protease inhibitor cocktail) containing 10% sucrose, 0.8 M NaCl, and 2% Tween-20 (5 mL buffer/g tissue), incubated for 30 min at 24°C, and centrifuged at 100,000 x g for 30 min at 20°C; the remaining pellet was homogenized (following the same steps as above) in TE buffer containing 1% sarkosyl. The sarkosyl-insoluble pellet (i.e., the pathological TDP-43 fraction) was reconstituted in urea buffer (50 mM tris, pH 8.5, 8 M urea and 2% SDS), ultrasonicated (five 1 s pulses), and stored at -70°C before further use.

The brain tissue fraction enriched for TDP-43 pathology, both from individual brain tissue samples and pools (i.e., FTLN type A, B and C, FTLN-tau, AD, and unaffected controls), was normalized

by protein concentration using the bicinchoninic assay as per the manufacturer's instructions, then reduced (30 min incubation at 37°C with 1 µg DTT) and alkylated (20 min incubation with 5 µg of iodoacetamide in the dark). Subsequently, samples were separated via electrophoresis using 10% polyacrylamide gels under denaturing conditions, in duplicate, with one gel transferred to a nitrocellulose membrane for Western blot analysis, as previously described.<sup>1,2</sup>

For gel electrophoresis, 40 µg for individual cases or 100 µg for pooled cases of total protein were loaded on the gel. Gels were fixed for 1 h (40% ethanol; 10% acetic acid); stained overnight (0.12% Coomassie G250, 10% ammonium sulphate, 10% phosphoric acid, 20% methanol); and de-stained in water overnight prior to imaging.

To prepare gel pieces for digestion, sequential incubations were performed at room temperature in 50% 25 mM AHC, 50% ACN, until gel pieces were transparent (overnight), and then the gel pieces were dehydrated in 100% ACN for 20 min. Gel pieces were then rehydrated in 50 mM AHC, digested overnight at 37°C using either trypsin or chymotrypsin. For the analysis of pooled samples, digestion was performed using 1 µg of TCPK-chymotrypsin (2 mM calcium chloride and 100 mM tris-HCl, pH 8) or 1 µg of TPCK-trypsin. For analysis of individual cases, 1 µg of TPCK-trypsin was used. Digestion was halted by adding 50 µL of 1% formic acid. The supernatant was removed and saved for analysis. Peptides were extracted by incubating for 20 min (with shaking at 1000 rpm) in 0.5% formic acid, then 40% ACN containing 0.1% formic acid, and then 100% ACN. Supernatants were combined and dried by vacuum centrifugation. Dried peptide extracts were reconstituted in 0.5% formic acid and desalted using C18 tips (prepared and used as previously described).<sup>3</sup> Eluates for each sample were collected in a single tube and dried by vacuum centrifugation.

### 1.3 High resolution mass spectrometry

The following search parameters were used; semi-specific enzymatic cutting, maximum of 1 missed cleavage site, variable modifications of deamidation (+0.984016 @ N, Q), acetylation (@ protein N-term), and oxidation (+15.994915 @ M), and a mass tolerance of 20 ppm. Peptide FDR was calculated manually by sorting the data by the |log prob| parameter and calculating the percent of reverse-hits.

Quantitative analyses of TDP-43 proteoform concentration were based on the peptide TDP<sub>276-293</sub>, as this was the most frequently observed peptide and of the commonly observed TDP-43 peptides had the highest signal intensity. For total truncated TDP-43 concentration, mid- and low-TDP peptide concentrations were combined via logistic regression. Proteoform correlations were done through comparing TDP<sub>276-293</sub> peptide concentrations; an outlier for the mid:low-TDP comparison was removed as it was 10-fold higher than all other data-points, limiting the interpretation of these data.

To rule-out in-source fragmentation of peptides with non-tryptic/chymotryptic cleavage sites, peptide retention time was compared between the fully-tryptic or fully-chymotryptic peptides and the respective non-fully-tryptic/chymotryptic peptide. If the fully-tryptic/chymotryptic and non-fully-tryptic/chymotryptic peptides have a similar retention time then in-source fragmentation is suspected as both peptides would have had to have similar structures to migrate similarly through the analytical column. If retention times are different, then in-source fragmentation is ruled-out. Peptides with one non-tryptic/chymotryptic cleavage site were further vetted by investigating the

literature for previous reports and enzymes that could create this TDP-43 cleavage site. Peptides with non-tryptic/chymotryptic cleavage sites with which in-source fragmentation could be ruled out and experimental evidence shows human enzymes could cleave at the respective site are referred to herein as “confident” *in vivo* proteolytic fragments, whereas sites with less evidence are referred to “potential” *in vivo* proteolytic cleavage sites.

## 1.4 Targeted mass spectrometry

### 1.4.1 Method development

Mass spectrometer parameters were optimized using tryptic digests of recombinant TDP-43 in buffer. Collision energy (CE) and declustering potential (DP) were optimized for each transition. The observed *m/z* of peptide precursor and product ions were verified using Skyline. Chromatography conditions were as follows; mobile phases A and B consisted of 0.1% formic acid in nano-pure grade water and 0.1% formic acid in LC-MS grade acetonitrile, respectively. A flow rate of 0.4  $\mu\text{L}/\text{min}$  and an analytical column temperature of 40 °C was used with the following gradient: ramp from 5–13% B from 0 to 1 min to 15% B by 3 min, to 30% B by 3.5 min, to 32% B by 5.5 min, to 45% B by 6 min, to 90% by 8.9 min, and to 5% from 9 to 11 min for re-equilibration.

### 1.4.2 Peptide quantification

Quantification was performed via single-point calibration using a heavy-isotope labeled synthetic version of TDP<sub>252–263</sub> and TDP<sub>276–293</sub> as the IS; lyophilized IS peptides were solubilized with deionized water, and 5% ACN + 0.1% FA, respectively. IS was then aliquoted and stored at –80 °C. The IS was spiked into each sample post-digestion to a final concentration of 0.464 nmol/L TDP<sub>252–263</sub> and 1.38 nmol/L TDP<sub>276–293</sub>. Quantification of each monitored TDP-43 peptide was performed using single-point calibration of the respective IS peptide. Pooled human FTLD-TDP brain tissue spiked with IS was used for quality control (QC) material.

### 1.4.3 Method validation

The Clinical and Laboratory Standards Institute Liquid Chromatography-Mass Spectrometry Methods C62-A guideline was used as a guide for the method validation experiments.<sup>4</sup> Precision studies were performed by doing triplicate measurements of the QC, repeated on three days. Imprecision was shown as % coefficient of variation (CV). The criteria for the lower limit of the measuring interval (LLMI) was a S/N ratio  $\geq 3$  for the observed quantifier ion and a transition peak area ratio (PAR) within 15% of the expected peak area ratio (ePAR), where the ePAR was determined from previous analysis of TDP-43 standards.<sup>1,2</sup> S/N was calculated as peak-to-peak within a 0.2 min retention time window of the signal peak. Linearity was assessed via a mixing study using brain tissue homogenate pools with high and low FTLD-TDP TDP-43 concentration (**Supplemental Figure 1**).

Imprecision was less than 10% for all concentrations tested for both peptides in both inter- and intra-assay comparisons (**Table 3**). This assay was linear from 0.033–0.494 nM for TDP<sub>252–263</sub> and 0.053–0.633 nM for TDP<sub>276–293</sub> with a lower limit of measuring interval of 0.033 nM ( $\pm 0.002$ ) and 0.053 nM ( $\pm 0.003$ ), respectively (**Supplemental Figure 1**).

## 2 Supplemental figures

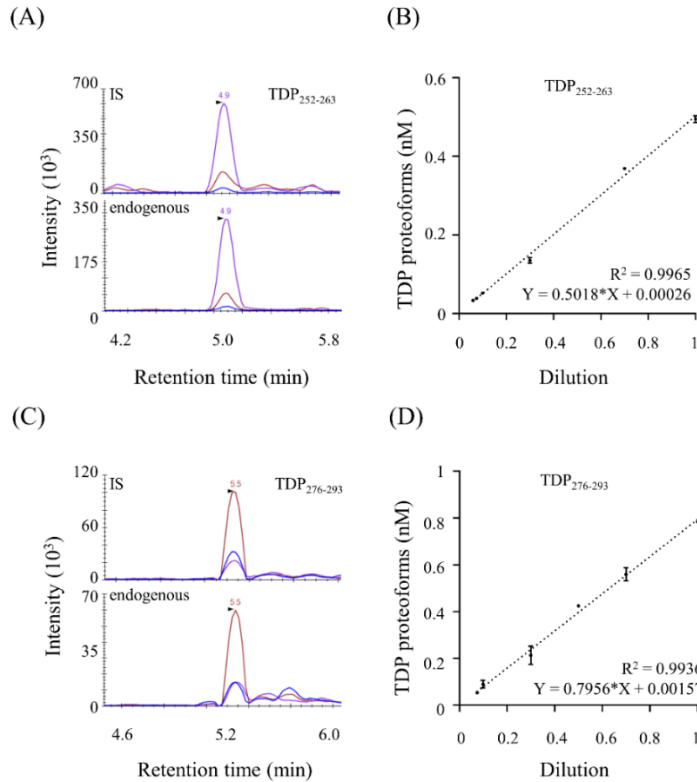

**Supplemental Figure 1:** Representative chromatograms and linearity of our targeted MRM method for absolute quantification of TDP-43 proteoforms. (A & C) Representative chromatograms from the analysis of human brain tissue with internal standards (IS). (B & D) Linearity of (B) TDP<sub>252-263</sub> and (D) TDP<sub>276-293</sub>, mean and standard deviation shown.

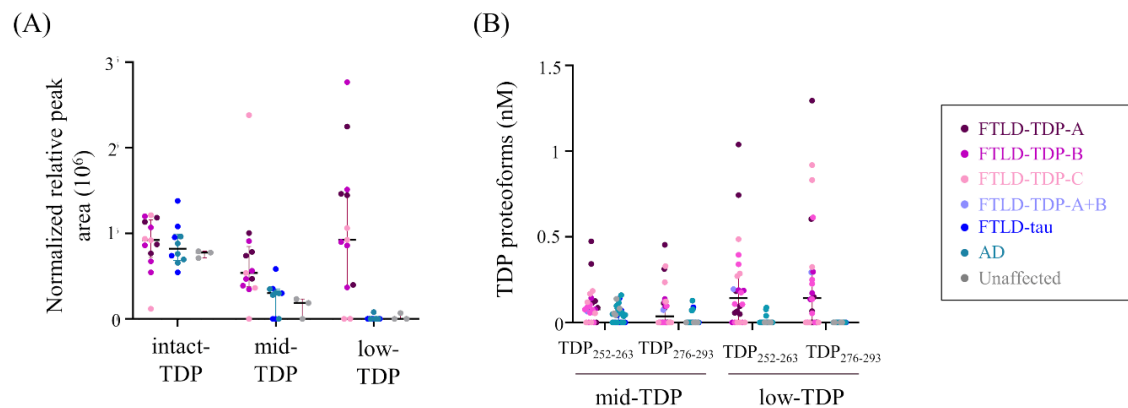

**Supplemental Figure 2:** TDP-43 proteoform concentration by neuropathological designation including FTLT-TDP subtype from the (A) the discovery (high resolution mass spectrometry) and (B) verification (targeted MRM) experiments demonstrating no clear trends by subtype.

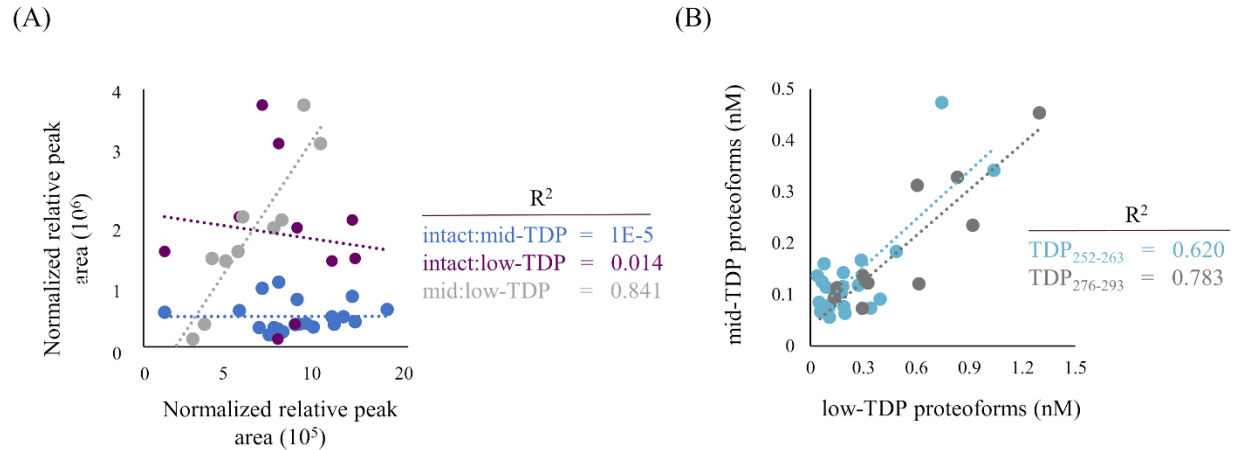

**Supplemental Figure 3:** The concentration of truncated proteoforms did correlate with each other but not the concentration of intact TDP-43 as demonstrated in the regression analysis of data from (A) the discovery (high resolution mass spectrometry) and (B) verification (targeted MRM) experiments.

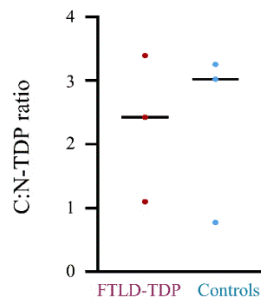

**Supplemental Figure 4:** The ratio of C-to-N-terminal TDP-43 peptides did not discriminate cases with and without TDP-43 pathology (data from analysis of pooled FTLD-TDP and control tissues).

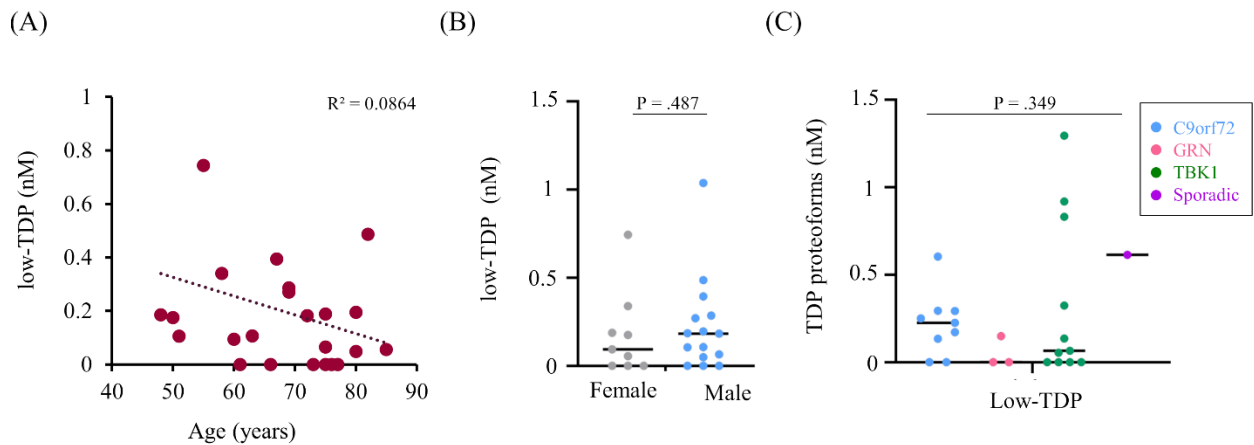

**Supplemental Figure 5:** Investigations of the correlation/effects of low-TDP-43 concentration with (A) age at death, (B) sex, and (C) genetic status.

### 3 Supplemental tables

**Supplemental Table 1:** Characterization of cases analyzed in the discovery and verification phases.

| Case | Sample type      | Sex | Age at death | Genetic variant | IHC in the frontal cortex |        |      |           |                     | TDP-43 in hippocampus | Discovery study |            | Verification study |
|------|------------------|-----|--------------|-----------------|---------------------------|--------|------|-----------|---------------------|-----------------------|-----------------|------------|--------------------|
|      |                  |     |              |                 | TDP                       | Ubiqu. | pTau | A $\beta$ | $\alpha$ -synuclein |                       | pools           | individual |                    |
| 1    | FTLD-TDP-A       | M   | 67           | GRN             | +                         | +      | -    | -         | +                   | +                     | ✓               | ✓          | -                  |
| 2    | FTLD-TDP-A       | M   | 72           | GRN             | +                         | +      | -    | -         | -                   | +                     | ✓               | ✓          | ✓                  |
| 3    | FTLD-TDP-A       | M   | 60           | no              | +                         | +      | -    | -         | -                   | +                     | ✓               | ✓          | ✓                  |
| 4    | FTLD-TDP-A       | F   | 85           | GRN             | +                         | +      | -    | +         | -                   | +                     | ✓               | ✓          | ✓                  |
| 5    | FTLD-TDP-B       | F   | 50           | C9orf72         | +                         | +      | -    | -         | -                   | +                     | ✓               | ✓          | ✓                  |
| 6    | FTLD-TDP-B       | M   | 77           | no              | +                         | +      | -    | -         | -                   | +                     | ✓               | ✓          | ✓                  |
| 7    | FTLD-TDP-B       | M   | 63           | no              | +                         | +      | -    | -         | -                   | +                     | ✓               | ✓          | ✓                  |
| 8    | FTLD-TDP-B       | M   | 51           | no              | +                         | +      | -    | -         | -                   | +                     | ✓               | ✓          | ✓                  |
| 9    | FTLD-TDP-B       | F   | 58           | C9orf72         | +                         | +      | -    | -         | -                   | +                     | ✓               | ✓          | ✓                  |
| 10   | FTLD-TDP-C       | M   | 73           | no              | +                         | +      | -    | -         | -                   | +                     | ✓               | ✓          | ✓                  |
| 11   | FTLD-TDP-C       | M   | 82           | no              | +                         | +      | -    | -         | -                   | +                     | ✓               | ✓          | ✓                  |
| 12   | FTLD-TDP-C       | F   | 76           | no              | +                         | +      | -    | +         | -                   | +                     | ✓               | ✓          | ✓                  |
| 13   | FTLD-TDP-C       | M   | 69           | no              | +                         | +      | -    | -         | -                   | +                     | ✓               | ✓          | ✓                  |
| 19   | CBD              | M   | 53           | na              | -                         | +      | +    | -         | -                   | -                     | ✓               | ✓          | ✓                  |
| 20   | CBD              | M   | 75           | na              | -                         | +      | +    | -         | -                   | -                     | ✓               | ✓          | -                  |
| 21   | PiD              | F   | 66           | na              | -                         | +      | +    | -         | -                   | -                     | ✓               | ✓          | ✓                  |
| 22   | PSP              | F   | 61           | na              | -                         | +      | "    | -         | -                   | -                     | ✓               | ✓          | ✓                  |
| 23   | PSP              | M   | 81           | na              | -                         | +      | +    | +         | -                   | +                     | ✓               | ✓          | ✓                  |
| 14   | AD               | M   | 88           | na              | -                         | +      | +    | +         | -                   | -                     | ✓               | ✓          | ✓                  |
| 15   | AD               | F   | 70           | na              | -                         | +      | +    | +         | -                   | -                     | ✓               | ✓          | ✓                  |
| 16   | AD               | M   | 62           | na              | -                         | +      | +    | +         | -                   | -                     | ✓               | ✓          | ✓                  |
| 17   | AD               | F   | 84           | na              | -                         | +      | +    | +         | -                   | -                     | ✓               | ✓          | ✓                  |
| 18   | AD               | F   | 75           | na              | -                         | +      | +    | +         | -                   | -                     | ✓               | ✓          | ✓                  |
| 24   | non-neurological | F   | 62           | na              | -                         | -      | -    | -         | -                   | -                     | ✓               | ✓          | ✓                  |
| 25   | non-neurological | F   | 91           | na              | -                         | -      | -    | -         | -                   | -                     | ✓               | ✓          | ✓                  |
| 26   | non-neurological | M   | 70           | na              | -                         | -      | -    | -         | -                   | -                     | ✓               | ✓          | ✓                  |
| 27   | FTLD-TDP-A       | M   | 80           | no              | +                         | +      | +    | +         | -                   | +                     | ✓               | -          | ✓                  |

|    |                        |   |    |         |   |   |      |   |   |   |   |   |   |
|----|------------------------|---|----|---------|---|---|------|---|---|---|---|---|---|
| 28 | FTLD-TDP-C             | F | 61 | no      | + | + | -    | - | - | + | ✓ | - | ✓ |
| 29 | non-neurological       | F | 73 | na      | - | + | -    | + | - | - | ✓ | - | ✓ |
| 30 | FTLD-TDP-A             | F | 60 | GRN     | + | + | -    | - | - | + | - | - | ✓ |
| 31 | FTLD-TDP-A             | F | 55 | C9orf72 | + | + | -    | - | - | + | - | - | ✓ |
| 32 | FTLD-TDP-A+B           | M | 48 | C9orf72 | + | + | -    | - | - | + | - | - | ✓ |
| 33 | FTLD-TDP-A             | M | 75 | C9orf72 | + | + | -    | - | - | + | - | - | ✓ |
| 34 | FTLD-TDP-A +<br>mod AD | M | 80 | C9orf72 | + | + | -    | + | - | + | - | - | ✓ |
| 35 | FTLD-TDP-A+B           | M | 77 | C9orf72 | + | + | mild | + | - | + | - | - | ✓ |
| 36 | mild FTLD-<br>TDP-B    | F | 66 | C9orf72 | + | + | -    | - | - | + | - | - | ✓ |
| 37 | FTLD-TDP-B             | M | 67 | TBK1    | + | + | -    | + | - | + | - | - | ✓ |
| 38 | FTLD-TDP-A+B           | F | 75 | C9orf72 | + | + | +    | + | - | + | - | - | ✓ |
| 39 | FTLD-TDP-C             | M | 69 | no      | + | + | -    | - | - | + | - | - | ✓ |
| 40 | PSP                    | F | 59 | na      | - | + | +    | + | - | - | - | - | ✓ |
| 41 | PSP                    | M | 75 | na      | - | + | +    | - | - | - | - | - | ✓ |
| 42 | AD                     | F | 79 | na      | - | + | +    | + | - | - | - | - | ✓ |
| 43 | AD + CVD               | F | 79 | na      | - | + | +    | + | - | - | - | - | ✓ |
| 44 | AD + DLB               | M | 82 | na      | - | + | +    | + | + | - | - | - | ✓ |
| 45 | LBD, moderate<br>AD    | F | 75 | na      | - | + | +    | + | + | - | - | - | ✓ |
| 46 | PSP                    | M | 84 | na      | - | + | +    | - | - | - | - | - | ✓ |
| 47 | AD + DLB               | M | 92 | na      | - | + | +    | + | + | - | - | - | ✓ |
| 48 | AD                     | M | 65 | na      | - | + | +    | + | - | - | - | - | ✓ |
| 49 | AD                     | F | 73 | na      | - | + | +    | + | - | - | - | - | ✓ |
| 50 | AD                     | M | 79 | na      | - | + | +    | + | - | - | - | - | ✓ |
| 51 | PSP + DLB              | M | 74 | na      | - | + | +    | - | + | - | - | - | ✓ |
| 52 | AD + DLB +<br>TDP      | M | 82 | na      | - | + | +    | + | + | + | - | - | ✓ |
| 53 | AD + DLB +<br>TDP      | F | 72 | na      | - | + | +    | + | + | + | - | - | ✓ |

---



**Supplemental Table 2:** Transitions monitored in the quantitative MRM method.

| Peptide                | Q1 ion (m/z) | Q1 charge state | Q3 ion (m/z) | Fragment ion    | DP (V) | CE (V) |
|------------------------|--------------|-----------------|--------------|-----------------|--------|--------|
| TDP <sub>252-263</sub> | 417.90       | 3+              | 541.29       | y <sub>10</sub> | 80     | 18     |
|                        |              |                 | 448.24       | y <sub>8</sub>  | 80     | 25     |
| TDP <sub>252-263</sub> | 420.57       | 3+              | 545.29       | y <sub>10</sub> | 80     | 18     |
|                        |              |                 | 452.24       | y <sub>8</sub>  | 80     | 23     |
| TDP <sub>276-293</sub> | 863.89       | 2+              | 676.31       | y <sub>14</sub> | 60     | 42     |
|                        |              |                 | 993.45       | y <sub>10</sub> | 60     | 45     |
| TDP <sub>276-293</sub> | 868.89       | 2+              | 681.32       | y <sub>14</sub> | 60     | 42     |
|                        |              |                 | 1003.46      | y <sub>10</sub> | 60     | 45     |

**Supplemental Table 3:** Upper and lower limit of the measuring interval (ULMI and LLMI, respectively) and precision of the quantitative MRM method.

| Peptide                | Point | Concentration (nM) | CV (%) |
|------------------------|-------|--------------------|--------|
| TDP <sub>252-263</sub> | ULMI  | 0.49               | 1.77   |
|                        | LLMI  | 0.04               | 3.34   |
| TDP <sub>276-293</sub> | ULMI  | 0.78               | 0.60   |
|                        | LLMI  | 0.05               | 9.10   |

**Supplemental Table 4:** TDP-43 peptides identified in published discovery proteomics studies that investigated human central nervous system tissue.

| TDP-43 residues | C or N term* | TDP-43 specific peptide | ISF <sup>†</sup> | known enzyme cleavage <sup>‡</sup> |           | MW gel fraction | Maximal predicted MW <sup>¶</sup> | Gel fraction matches predicted MW <sup>§</sup> | Disease type | ALS and/or FTLN specific <sup>#</sup> | Ref. |
|-----------------|--------------|-------------------------|------------------|------------------------------------|-----------|-----------------|-----------------------------------|------------------------------------------------|--------------|---------------------------------------|------|
|                 |              |                         |                  | predicted                          | empirical |                 |                                   |                                                |              |                                       |      |
| 208-nd          | C            | ✓                       | nd               | ✓                                  | ✗         | 22              | 21-40                             | ✓                                              | FTLD-U       | nd                                    | 5    |
| 276-291         | N            | ✓                       | nd               | ✗                                  | ✓         | 39-43           | 33-155                            | ✓                                              | FTLD-U       | ✓                                     | 6    |
| 230-256         | N            | ✓                       | nd               | ✓                                  | ✗         | 25-26           | 29-141                            | ✓                                              | ALS          | nd                                    | 7    |
| 257-276         | C            | ✓                       | nd               | ✓                                  | ✗         | 25-26           | 16-18                             | ✗                                              | ALS, AD      | ✗                                     | 7    |
| 175-187         | C            | ✓                       | nd               | ✗                                  | ✗         | Not reported    | 25-79                             | N/A                                            | ALS, AD      | ✗                                     | 7    |
| 219-227         | C            | ✓                       | nd               | ✓                                  | ✓         | 23              | 20-39                             | ✓                                              | FTLD-U       | nd                                    | 8    |
| 247-251         | C            | ✗                       | nd               | ✓                                  | ✗         | 23              | 17-19                             | ✓                                              | FTLD-U       | nd                                    | 8    |

\* *In vivo* cleavage site (i.e., non-tryptic/chymotryptic site) on the N- or C-terminus of the peptide

<sup>†</sup> In source fragmentation (ISF) ruled out (✓) or in (✗) using retention time differences and relative alterations in hydrophobicity

<sup>‡</sup> Predicted or empirical evidence of human enzymatic cleavage site based on ExPASy data and previously published experiments, respectively

<sup>¶</sup> Peptide maximal molecular weight (without – with maximal predicted PTMs) and including empirical evidence

<sup>§</sup> Molecular weight of the protein sequence based on the *in vivo* truncation site is consistent with the gel electrophoresis band region from which the peptide was found, including consideration of other additive potential post-translational modifications (e.g., phosphorylation)

<sup>#</sup> Compared to relevant controls and found only in FTLN-TDP or ALS cases

## 4 References

- [1] Pobran TD, Forgrave LM, Zheng YZ, Lim JGK, Mackenzie IRA, DeMarco ML. Detection and characterization of TDP-43 in human cells and tissues by multiple reaction monitoring mass spectrometry. *Clinical Mass Spectrometry*. 2019;14:66-73.
- [2] Pobran TD, Yang D, Mackenzie IRA, DeMarco ML. Aptamer-based enrichment of TDP-43 from human cells and tissues with quantification by HPLC-MS/MS. *J Neurosci Methods*. 2021;363:109344.
- [3] Ishihama Y, Rappsilber J, Andersen JS, Mann M. Microcolumns with self-assembled particle frits for proteomics. *J Chromatogr A*. 2002;979(1-2):233-9.
- [4] Clinical & Laboratory Standards Institute. Liquid chromatography-mass spectrometry methods; approved guideline: CLSI document C62-A. Clin Lab Standards Inst. 2014.
- [5] Igaz LM, Kwong LK, Chen-Plotkin A, Winton MJ, Unger TL, Xu Y, et al. Expression of TDP-43 C-terminal fragments in vitro recapitulates pathological features of TDP-43 proteinopathies. *J Biol Chem*. 2009;284(13):8516-24.
- [6] Herskowitz JH, Gozal YM, Duong DM, Dammer EB, Gearing M, Ye K, et al. Asparaginyl endopeptidase cleaves TDP-43 in brain. *Proteomics*. 2012;12(15-16):2455-63.
- [7] Feneberg E, Charles PD, Finelli MJ, Scott C, Kessler BM, Fischer R, et al. Detection and quantification of novel C-terminal TDP-43 fragments in ALS-TDP. *Brain Pathol*. 2021;31(4):e12923.
- [8] Nonaka T, Kametani F, Arai T, Akiyama H, Hasegawa M. Truncation and pathogenic mutations facilitate the formation of intracellular aggregates of TDP-43. *Hum Mol Genet*. 2009;18(18):3353-64.
